# Supplementary material
Source: PubMed Central journal article supplement (PMC3217306)
Supplement: bi201340t_si_001.pdf [file bi201340t_si_001.pdf]

# Flavin-induced oligomerization in *Escherichia coli* adaptive response protein AidB<sup>†</sup>

## Supporting Information

*Michael J. Hamill<sup>1,2,7</sup>, Marco Jost<sup>2,7</sup>, Cintyu Wong<sup>2,6</sup>, Sean J. Elliott\*<sup>1</sup>,*

*and Catherine L. Drennan\*<sup>2,3,4,5</sup>*

<sup>1</sup>Department of Chemistry, Boston University, 590 Commonwealth Avenue, Boston,  
Massachusetts 02215

Departments of <sup>2</sup>Chemistry and <sup>3</sup>Biology, <sup>4</sup>Howard Hughes Medical Institute, and <sup>5</sup>Center for  
Environmental Health, Massachusetts Institute of Technology, 77 Massachusetts Avenue,  
Cambridge, Massachusetts 02139

<sup>6</sup>Present address: Johnson & Johnson Pharmaceutical Research & Development, 930 Route 202  
South, Raritan, New Jersey 08869

<sup>7</sup>These authors contributed equally to this work.

†: This work was funded by the National Institutes of Health (NIGMS, R01-GM072663) to  
S.J.E and P30-ES002109 to C.L.D, and National Science Foundation (MCB-0543833) to C.L.D.  
C.L.D. is a Howard Hughes Medical Institute Investigator.

\* Correspondence should be addressed to:

Catherine L. Drennan: Tel: 617-253-5622. Fax: 617-258-7847. E-mail: [cdrennan@mit.edu](mailto:cdrennan@mit.edu)

Sean J. Elliott: Tel: 617-358-2816. Fax: 617-353-6466. E-mail: [elliott@bu.edu](mailto:elliott@bu.edu)

**Table S1.** Primer pairs used to generate the triple mutant of AidB (*mtAidB*)

| Mutation    | Primer pair used                                                                                                                               |
|-------------|------------------------------------------------------------------------------------------------------------------------------------------------|
| T185V-S191R | forward:<br>5'-<br>GGCATGGGAATGGTGGAAAAGCAGGGCGGTAGGGATGTTATGAGC-<br>3'<br>reverse:<br>5'-GCTCATAACATCCCTACCGCCCTGCTTTTCCACCATTCCCATGCC-<br>3' |
| R324D       | forward: 5'-TATCATGCACATCAAGACCATGTTTTTGGTAAT-3'<br>reverse: 5'-ATTACCAAAAACATGGTCTTGATGTGCATGATA-3'                                           |

**Table S2.** Data collection statistics

|                                                            | <b>holo <i>wtAidB</i></b>    |
|------------------------------------------------------------|------------------------------|
| Beamline                                                   | APS 24ID-C                   |
| Wavelength (Å)                                             | 1.0000                       |
| Detector                                                   | Q315 ADSC                    |
| Space group                                                | $P3_2$                       |
| Unit cell parameters (Å)                                   | a = b = 179.29<br>c = 204.24 |
| Resolution (Å) <sup>a</sup>                                | 50.0 – 2.80 (2.90 – 2.80)    |
| No. of unique reflections <sup>a</sup>                     | 174735 (17687)               |
| $R_{\text{sym}}(\%)^{\text{a,b}}$                          | 9.5 (45.7)                   |
| Completeness(%) <sup>a</sup>                               | 96.2 (97.4)                  |
| Multiplicity <sup>a</sup>                                  | 6.1 (5.1)                    |
| $\langle I \rangle / \langle \sigma(I) \rangle^{\text{a}}$ | 14.1 (3.3)                   |
| Wilson $B$ -Factor (Å <sup>2</sup> )                       | 45.3                         |

<sup>a</sup>Numbers for the highest resolution shell are shown in parentheses.

<sup>b</sup> $R_{\text{sym}} = ( \sum_i \sum_{hkl} |I_i(hkl) - \langle I(hkl) \rangle| ) / \sum_{hkl} \langle I(hkl) \rangle$ , where  $I_i(hkl)$  is the intensity of the  $i^{\text{th}}$  measured reflection, and  $\langle I(hkl) \rangle$  is the mean intensity for the reflection with the Miller index  $(hkl)$ .

**Table S3.** Crystallographic refinement statistics

|                                                  | <b>holo wtAidB</b> |
|--------------------------------------------------|--------------------|
| Resolution range (Å)                             | 46.2 – 2.80        |
| $R_{\text{cryst}}^{\text{a}}$                    | 0.204              |
| $R_{\text{free}}^{\text{a}}$                     | 0.229              |
| No. of non-hydrogen atoms                        |                    |
| protein                                          | 49649              |
| FAD                                              | 636                |
| chloride                                         | 12                 |
| water                                            | 297                |
| Average isotropic $B$ -Factors (Å <sup>2</sup> ) |                    |
| protein main chain / side chain                  | 47.3/48.6          |
| FAD                                              | 45.6               |
| chloride                                         | 50.9               |
| water                                            | 28.6               |
| r.m.s.d. <sup>b</sup> for bond lengths (Å)       | 0.005              |
| r.m.s.d. <sup>b</sup> for bond angles (°)        | 0.828              |
| Ramachandran statistics (% residues)             |                    |
| favored                                          | 98.1               |
| allowed                                          | 1.8                |
| disallowed                                       | 0.1                |

<sup>a</sup> $R_{\text{cryst}} = ( \sum_{hkl} |F_{\text{obs}}(hkl)| - |F_{\text{calc}}(hkl)| ) / \sum_{hkl} |F_{\text{obs}}(hkl)|$ ;  $R_{\text{free}}$  is calculated identically, using 5% of reflections omitted from refinement.

<sup>b</sup>r.m.s.d. = root-mean-square deviation.

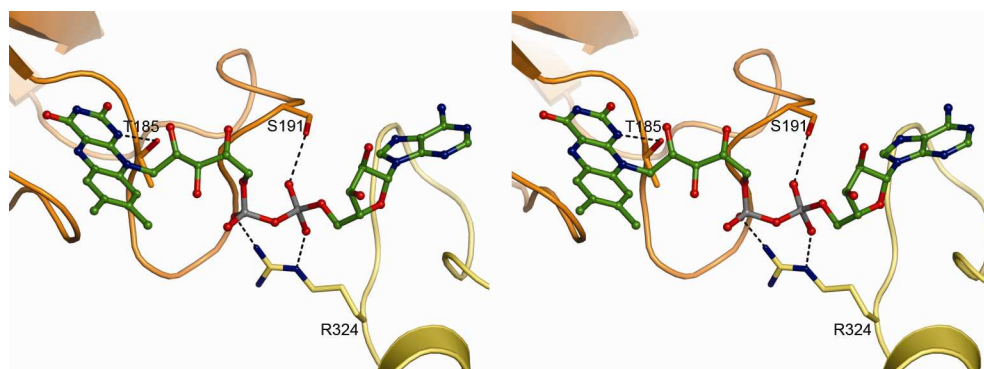

**Figure S1.** Wall-eyed stereo view of the flavin-binding site of holo *wtAidB* and the residues mutated to generate the flavin-binding deficient *mtAidB*. The two protomers contributing to flavin binding are shown in orange and yellow ribbons. Mutated residues are shown in sticks, with carbon atoms colored according to their protomer. Interactions between these residues and the FAD cofactor are indicated by dashed black lines.

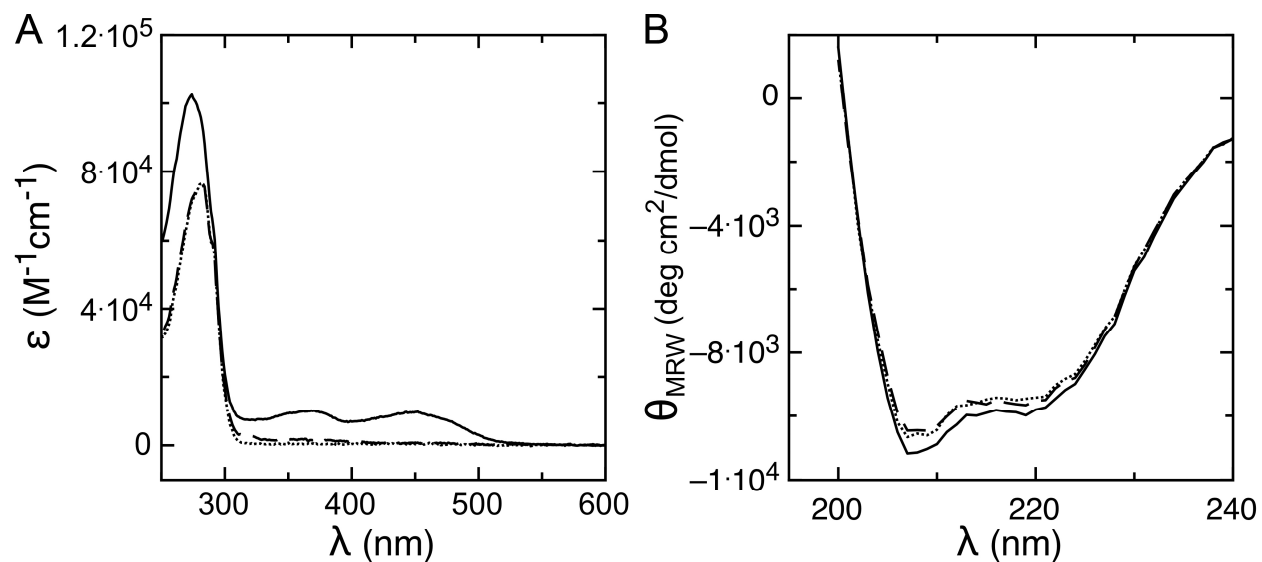

**Figure S2.** Spectroscopic properties of holo *wtAidB*, apo *wtAidB*, and apo *mtAidB*. (A) UV/Vis spectra of holo *wtAidB* (solid line), apo *wtAidB* (dotted line), and apo *mtAidB* (dashed line). (B) CD spectra of holo *wtAidB* (solid line), apo *wtAidB* (dotted line) and apo *mtAidB* (dashed line).

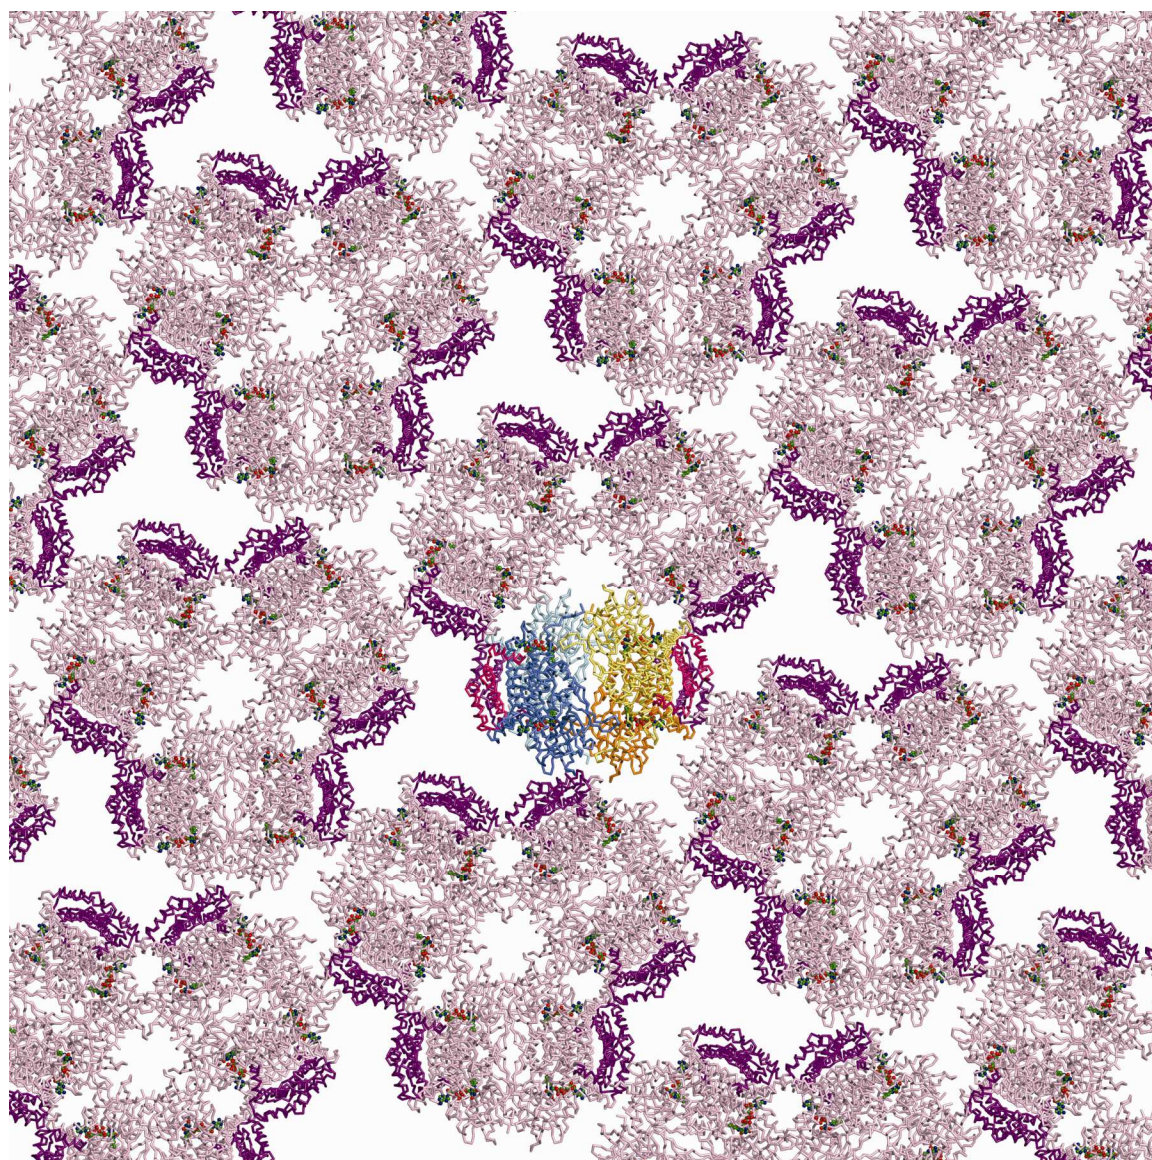

**Figure S3.**  $C_\alpha$ -traces of holo *wtAidB* molecules in the  $P3_2$  crystal lattice. One tetramer of AidB is colored by protomer in yellow, orange, cyan, and blue. The other tetramers are shown in pink. The putative DNA-binding regions are highlighted in purple and magenta. Bound FAD molecules are shown in the ball-and-stick representation with carbon atoms in green.

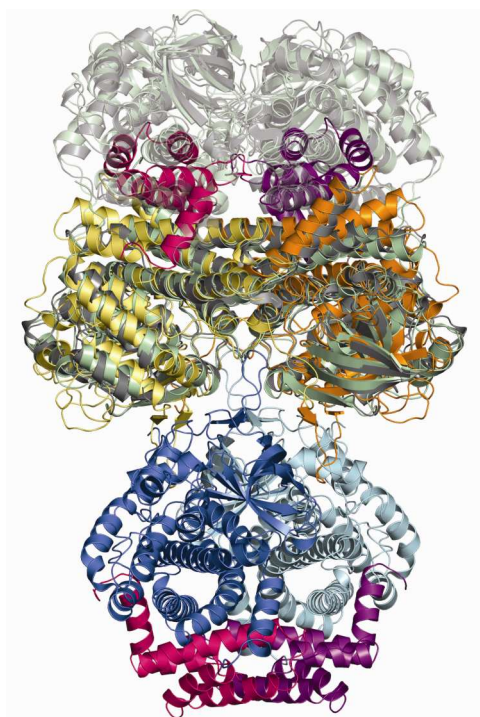

**Figure S4.** Superimposition of holo *wtAidB* with IVD (PDB code 1IVH) and MCAD (PDB code 3MDD). The AB dimer of AidB, shown in yellow and orange, superposes well with dimers of IVD (r.m.s.d. 1.68 Å over 314 C<sub>α</sub>-atoms) and MCAD (r.m.s.d. 1.70 Å over 303 C<sub>α</sub>-atoms), shown as solid gray and solid green ribbons, respectively. The tetramer of AidB exhibits a different architecture than the tetramers of IVD and MCAD. In AidB, the putative DNA-binding domain, colored in magenta and purple, prevents the formation of the tetramer observed in IVD and MCAD. The position of the second dimer of AidB, shown in blue and cyan, does not correlate with the position of the second dimer for IVD (transparent gray) and MCAD (transparent green).
